# Supplementary material
Source: publisher figshare collection journal article supplement (https://sage.figshare.com/ndownloader/files/14501093)
Supplement: Supplementary file 1 [file 14501093]

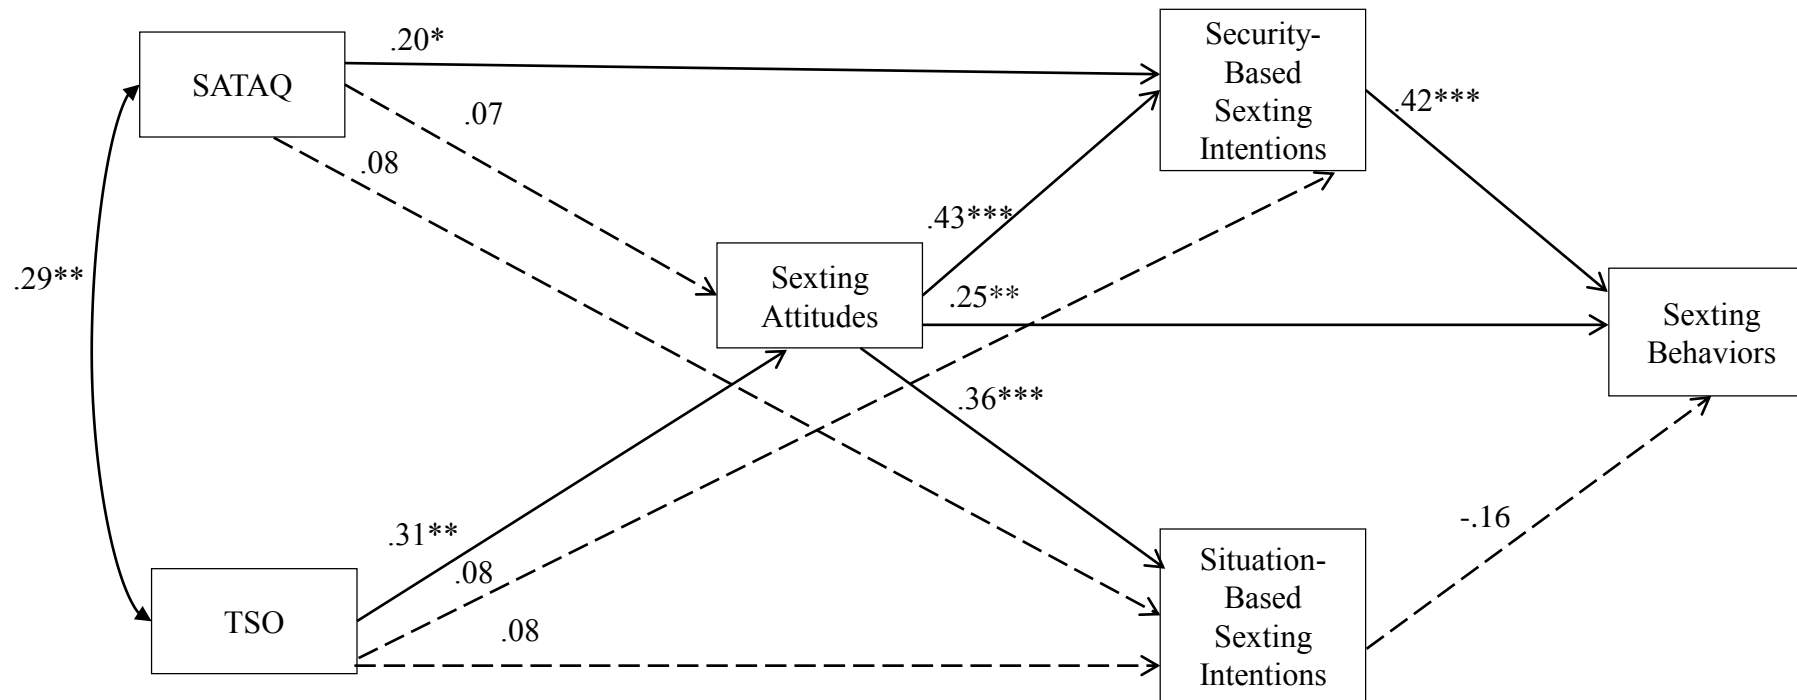

**Figure 4. The fitted path model for female adolescents, without covariates.**

*Notes.* SATAQ = internalization of media ideals. TSO = trait self-objectification. Error variances between sexting intentions were allowed to co-vary. These covariances are not included in the model here for ease of interpretation. Non-significant paths are dashed. \*  $p < .05$ , \*\*  $p < .01$ ; \*\*\*  $p < .001$ .

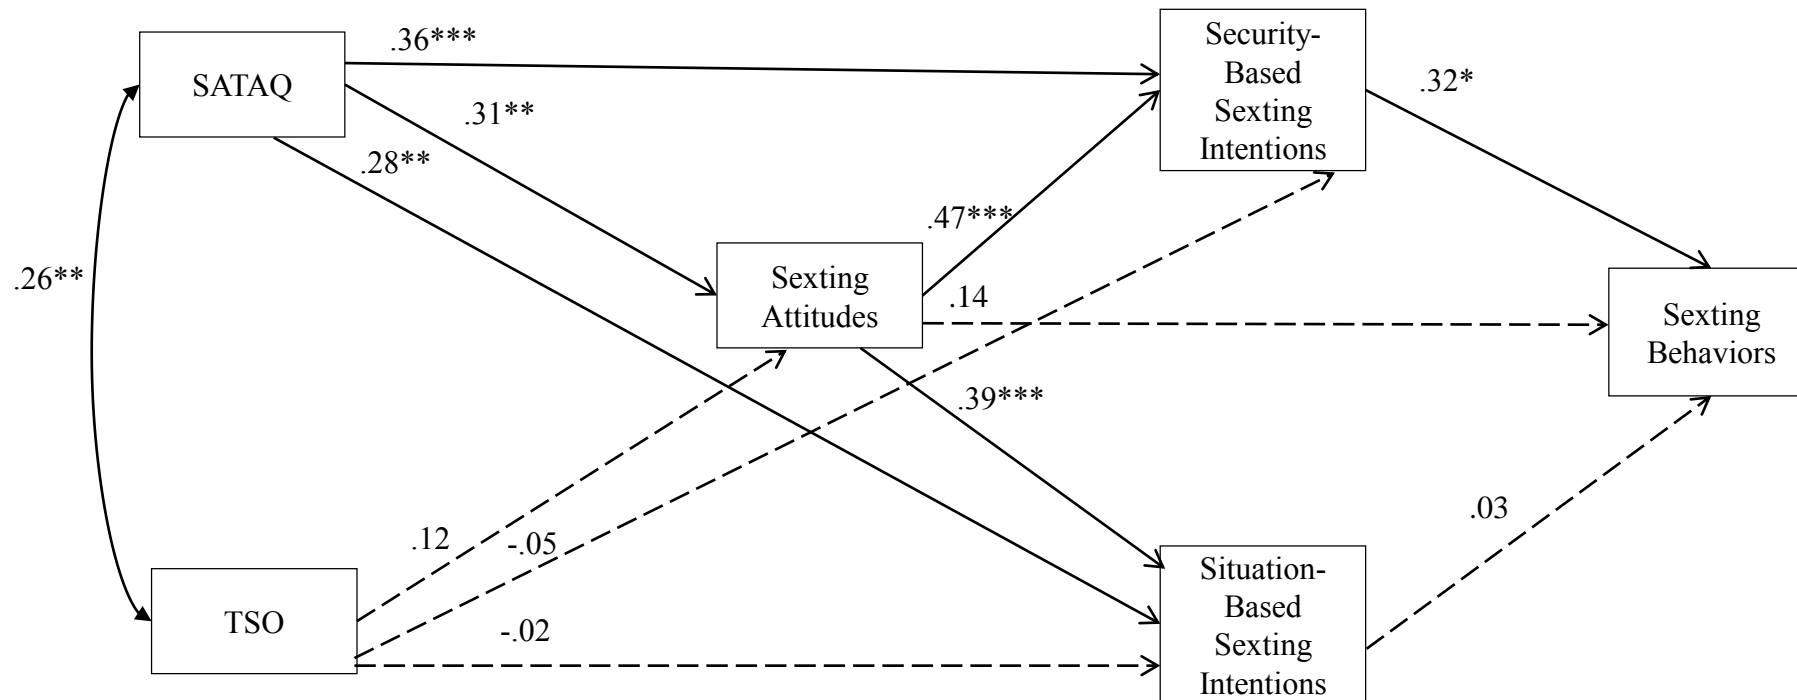

**Figure 5. The fitted path model for male adolescents, without covariates.**

*Notes.* SATAQ = internalization of media ideals. TSO = trait self-objectification. Error variances between sexting intentions were allowed to co-vary. These covariances are not included in the model here for ease of interpretation. Non-significant paths are dashed. \*  $p < .05$ , \*\*  $p < .01$ ; \*\*\* $p < .001$ .
